# Supplementary material for: A Motor-Gradient and Clustering Model of the Centripetal Motility of MTOCs in Meiosis I of Mouse Oocytes
Source: PubMed Central journal article supplement (PMC5051731; doi:10.1371/journal.pcbi.1005102), 2016-10-05
Supplement: pcbi.1005102.s016.pdf [file pcbi.1005102.s016.pdf]

---

## Table S1

**S1 Table. Optimized RWD gradient parameters:** The top ten sum ranks are listed in ascending order, based on the ranks from the directionality and capture time error ( $\epsilon(k)$ ), with the corresponding parameters of the attractive ( $r_{1/2}^a$  and  $s^a$ ) and repulsive ( $r_{1/2}^r$  and  $s^r$ ) gradients (see Fig S2(A)).

| Parameter set (k) | Sum of ranks ( $R_s(k)$ ) | $r_{1/2}^a$ | $s^a$ | $r_{1/2}^r$ | $s^r$ |
|-------------------|---------------------------|-------------|-------|-------------|-------|
| 482               | 22                        | 10          | 1     | 0           | 2     |
| 487               | 34                        | 10          | 1     | 1           | 2     |
| 377               | 36                        | 8           | 1     | 3           | 2     |
| 497               | 37                        | 10          | 1     | 3           | 2     |
| 362               | 42                        | 8           | 1     | 0           | 2     |
| 372               | 43                        | 8           | 1     | 2           | 2     |
| 506               | 52                        | 10          | 1     | 5           | 1     |
| 267               | 55                        | 6           | 1     | 5           | 2     |
| 363               | 56                        | 8           | 1     | 0           | 3     |
| 492               | 56                        | 10          | 1     | 2           | 2     |
